# Supplementary material for: Pricing Time-Sensitive Services Based on Realized Performance
Source: Atypon-hosted journal article supplement (doi:10.1287/msom.2013.0434), 2013-05-04
Supplement: msom.2013.0434-sm-ec.pdf [file msom.2013.0434-sm-ec.pdf]

## Online Supplement: Proofs

**Proof of Proposition 1.** Suppose there are  $N$  customer types. Without loss of generality, suppose that  $K$  price-service classes are chosen by some customers. Write  $\lambda_{ik}$  for the rate of type- $i$  customers who buy class  $k$ , where  $\lambda_i = \sum_{k=1}^K \lambda_{ik}$  is the overall type- $i$  arrival rate.

*Part 1.* Suppose that for  $i \in \{1, 2, \dots, N\}$  and  $k \in \{1, 2, \dots, K\}$ , the arrival rates  $\{\lambda_{ik}\}$  and delays  $\{W_k\}$  are feasible, and that  $\{W_k\}$  and the price functions  $\{P_k\}$  form a customer equilibrium, i.e., they satisfy the individual rationality (IR) constraints, and if types are indistinguishable by the provider, the incentive-compatibility (IC) constraints. Since the customer equilibrium conditions and the provider's expected revenue rate depend on  $\{P_k\}$  only through the expectations  $\{E[P_k(W_k)]\}$ , setting the flat rates  $p_k = E[P_k(W_k)]$  for  $k \in \{1, 2, \dots, K\}$  establishes Part 1.

*Part 2.* If customer types have different service requirements, then the lead time in a given class may vary by type and there may not exist flat rates that ensure incentive-compatibility at the desired arrival rates. However, if types are distinguishable, then only the IR constraints need to hold. These constraints are easily satisfied since the provider can charge a different flat rate for each type. ■

**Proof of Proposition 2.** Fix a scheduling policy and a demand vector  $\boldsymbol{\lambda}$  such that the steady-state lead times of all classes have finite moments. Let  $W_i(\boldsymbol{\lambda})$  denote the lead time of class  $i$ , which is targeted to type  $i$ . To prove the result we show that: for given  $\boldsymbol{\lambda}$  and  $W_i(\boldsymbol{\lambda})$  the provider maximizes her expected type- $i$  revenue by charging  $P_i(W_i) = \underline{v}_i(\lambda_i) - C_i(W_i)$ , and the resulting revenue rate is a function of  $\boldsymbol{\lambda}$  that is invariant to customers' risk aversion levels.

*Part 1.* Because the provider can distinguish among types, he can limit each customer to the price-service class that is targeted to her type. It therefore suffices to prove the claim for a single type. For simplicity we write  $W_i$ , suppressing the dependence on  $\boldsymbol{\lambda}$ . Given  $\lambda_i$  and  $W_i$ , the provider maximizes the type- $i$  revenue by solving

$$\max_{P_i} \lambda_i E[P_i(W_i)] \tag{21}$$

$$s.t. \quad E[U(\underline{v}_i(\lambda_i) - C_i(W_i) - P_i(W_i))] = 0. \tag{22}$$

This problem is the multi-type analog of (1)-(2) for given  $\lambda_i$  and  $W_i$ . We have

$$U(E[\underline{v}_i(\lambda_i) - C_i(W_i) - P_i(W_i)]) \geq E[U(\underline{v}_i(\lambda_i) - C_i(W_i) - P_i(W_i))] = 0. \tag{23}$$

The inequality follows by Jensen's inequality since  $U$  is concave, and the equality follows from (22). Since  $U(0) = 0$  and  $U' > 0$ , we have  $U(x) \geq 0 \Leftrightarrow x \geq 0$ , so that (23) implies the following upper bound on the expected payment:

$$E[P_i(W_i)] \leq \underline{v}_i(\lambda_i) - E[C_i(W_i)],$$

with equality if and only if (23) holds with equality. If type  $i$  is RN, then the inequality in (23) holds with equality, and every tariff  $P_i$  is feasible if and only if  $E[P_i(W_i)] = \underline{v}_i(\lambda_i) - E[C_i(W_i)]$ . If type  $i$  is RA, i.e.,  $U$  is strictly concave, then the inequality in (23) holds with equality if and only if  $\underline{v}_i(\lambda_i) - C_i(W_i) - P_i(W_i) \equiv 0$ , i.e., the marginal customer's payoff is zero with probability one. It follows that  $P_i(W_i) \equiv \underline{v}_i(\lambda_i) - C_i(W_i)$  is the unique optimal tariff.

Since the optimal tariff has this form for arbitrary  $\lambda_i$  and  $W_i(\boldsymbol{\lambda})$ , it also has this form at the optimal arrival rates and the corresponding lead time distributions.

*Part 2.* Given a scheduling policy, the tariffs  $P_i(W_i) \equiv \underline{v}_i(\lambda_i) - C_i(W_i)$  maximize the revenue rate for fixed  $\boldsymbol{\lambda}$  and ensure that (22) holds for all types. The resulting revenue rate function is

$$\sum_{i=1}^N \lambda_i (\underline{v}_i(\lambda_i) - E[C_i(W_i(\boldsymbol{\lambda}))]), \quad (24)$$

which is independent of customers' risk aversion and is the same as for RN customers. ■

Lemma 1 summarizes useful properties of  $\widetilde{W}(\lambda, s)$  and  $L(\lambda, s)$  for Propositions 3-6.

**Lemma 1** *Let  $\widetilde{W}(\lambda, s) := E[\exp(sW(\lambda))]$  be the MGF of the r.v.  $W(\lambda)$  and  $L(\lambda, s) := \ln \widetilde{W}(\lambda, s)$ .*

1.  $\widetilde{W}(\lambda, s) \geq 0$ ,  $\widetilde{W}(\lambda, 0) = 1$ , and  $\widetilde{W}(\lambda, s)$  is strictly increasing in  $s$  with  $\widetilde{W}_s(\lambda, 0) = E[W(\lambda)]$ , and strictly convex in  $s$ .
2.  $L(\lambda, 0) = 0$ ,  $L(\lambda, s)$  is strictly increasing in  $s$  with  $L_s(\lambda, 0) = E[W(\lambda)]$ , and strictly convex in  $s$  with  $L_{ss}(\lambda, 0) = \text{Var}[W(\lambda)]$ .
3. For any constant  $k \neq 0$ ,  $L(\lambda, rk)/r$  is strictly increasing in  $r \geq 0$  and  $\lim_{r \rightarrow 0} L(\lambda, rk)/r = kE[W(\lambda)]$ .
4. If  $W(\lambda)$  is the sojourn time in a  $M/G/1$  queue, then: (a) For  $s > 0$  both  $\widetilde{W}(\lambda, s)$  and  $L(\lambda, s)$  are strictly increasing and strictly convex in  $\lambda$ , and for  $s < 0$  both  $\widetilde{W}(\lambda, s)$  and  $L(\lambda, s)$  are strictly decreasing and strictly concave in  $\lambda$ . (b) The function  $L_\lambda(\lambda, s)$  is strictly convex in  $s$ .

**Proof.** *Parts 1-2.* are standard. E.g., see Gallager (1996), Chapters 1 and 7 (problem 7.7).

*Part 3.* We first show that

$$\frac{d}{dr} \frac{L(\lambda, rk)}{r} = \frac{rkL_s(\lambda, rk) - L(\lambda, rk)}{r^2} > 0 \text{ for } r \geq 0. \quad (25)$$

For  $r > 0$ , (25) holds since  $L(\lambda, 0) = 0$  and  $L(\lambda, s)$  is strictly convex in  $s$  by Part 2, which implies

$$rkL_s(\lambda, rk) = \int_0^{rk} L_s(\lambda, rk) dx > \int_0^{rk} L_s(\lambda, x) dx = L(\lambda, rk).$$

For  $r = 0$  we have

$$\lim_{r \rightarrow 0} \frac{rkL_s(\lambda, rk) - L(\lambda, rk)}{r^2} = \lim_{r \rightarrow 0} \frac{rk^2L_{ss}(\lambda, rk)}{2r} = \frac{k^2\text{VAR}(W(\lambda))}{2} > 0.$$

The first equality follows since  $L(\lambda, 0) = 0$  (Part 2) and from l'Hôpital's rule, and the second since  $L_{ss}(\lambda, 0) = \text{Var}[W(\lambda)]$  by Part 2. Finally, we have

$$\lim_{r \rightarrow 0} \frac{L(\lambda, rk)}{r} = \lim_{r \rightarrow 0} \frac{d}{dr} L(\lambda, rk) = k \lim_{r \rightarrow 0} L_s(\lambda, rk) = kE[W(\lambda)].$$

The first equality follows since  $L(\lambda, 0) = 0$  (Part 2) and from l'Hôpital's rule, and the last since  $L_s(\lambda, 0) = E[W(\lambda)]$  by Part 2.

Part 4. Let  $X$  be the service time and  $\tilde{X}(s)$  the MGF of its distribution. Let  $X_e$  be the equilibrium residual service time and  $\tilde{X}_e(s)$  the MGF of its distribution. Then  $\tilde{X}_e(s) = \mu(\tilde{X}(s) - 1)/s$ . From the Pollaczek-Khinchin formula, the MGF of the sojourn time is

$$\tilde{W}(\lambda, s) = \tilde{X}(s) \frac{1 - \rho}{1 - \rho\tilde{X}_e(s)} = \tilde{X}(s) \frac{\mu - \lambda}{\mu - \lambda\tilde{X}_e(s)},$$

and it is defined only for  $s$  such that  $1 > \rho\tilde{X}_e(s)$ , or equivalently,  $\mu - \lambda\tilde{X}_e(s) > 0$ .

4(a) First consider  $\tilde{W}(\lambda, s)$ . We have

$$\begin{aligned}\tilde{W}_\lambda(\lambda, s) &= \frac{\mu\tilde{X}(s)}{(\mu - \lambda\tilde{X}_e(s))^2} (\tilde{X}_e(s) - 1) \\ \tilde{W}_{\lambda\lambda}(\lambda, s) &= \frac{2\mu\tilde{X}(s)\tilde{X}_e(s)}{(\mu - \lambda\tilde{X}_e(s))^3} (\tilde{X}_e(s) - 1).\end{aligned}$$

Both have the same sign as  $(\tilde{X}_e(s) - 1)$ , which has the sign of  $s$  because  $X_e$  is nonnegative: for  $x \geq 0$ ,  $\text{sgn}(e^{sx} - 1) = \text{sgn}(s)$ . This establishes 4(a) for  $\tilde{W}(\lambda, s)$ . For  $L(\lambda, s)$  we get

$$\begin{aligned}L_\lambda(\lambda, s) &= \frac{\tilde{W}_\lambda(\lambda, s)}{\tilde{W}(\lambda, s)} = \frac{\mu - \lambda\tilde{X}_e(s)}{\tilde{X}(s)(\mu - \lambda)} \frac{\mu\tilde{X}(s)}{(\mu - \lambda\tilde{X}_e(s))^2} (\tilde{X}_e(s) - 1) = \frac{\mu}{\mu - \lambda} \frac{\tilde{X}_e(s) - 1}{\mu - \lambda\tilde{X}_e(s)}, \\ L_{\lambda\lambda}(\lambda, s) &= \mu \frac{\mu - \lambda\tilde{X}_e(s) + \tilde{X}_e(s)(\mu - \lambda)}{(\mu - \lambda)^2 (\mu - \lambda\tilde{X}_e(s))^2} (\tilde{X}_e(s) - 1).\end{aligned}$$

As above both have the sign of  $s$ .

4(b) We have

$$L_{\lambda s}(\lambda, s) = \frac{\mu}{\mu - \lambda} \frac{\tilde{X}'_e(s) (\mu - \lambda\tilde{X}_e) + \lambda (\tilde{X}_e(s) - 1) \tilde{X}'_e(s)}{(\mu - \lambda\tilde{X}_e(s))^2} = \frac{\mu\tilde{X}'_e(s)}{(\mu - \lambda\tilde{X}_e(s))^2}.$$

Noting that  $\tilde{X}''_e(s) > 0$  by Part 1, it follows that

$$L_{\lambda ss}(\lambda, s) = \frac{\mu\tilde{X}''_e(s)}{(\mu - \lambda\tilde{X}_e(s))^2} + \frac{2\lambda\mu (\tilde{X}'_e(s))^2}{(\mu - \lambda\tilde{X}_e(s))^3} > 0.$$

■

### Proof of Proposition 3.

Let  $\lambda = \lambda_1 + \lambda_2$ . Since customers' processing requirements are i.i.d., the distribution of  $W$  depends on the rates  $\lambda_i$  only through their sum  $\lambda$ . The demand system satisfies

$$\alpha \begin{cases} = \underline{v}_i(\lambda_i) - \frac{L(\lambda, r_i(c_i - \beta))}{r_i}, & \lambda_i > 0 \\ \geq \underline{v}_i(\lambda_i) - \frac{L(\lambda, r_i(c_i - \beta))}{r_i}, & \lambda_i = 0 \end{cases}, \quad (26)$$

which is the 2-type version of (4). If it is optimal to serve both types, then the optimal linear price function  $\alpha^* - \beta^*W$  and the resulting demand vector  $\boldsymbol{\lambda}^*$  must be a solution of the problem

$$\max_{\alpha, \beta, \boldsymbol{\lambda}} \Pi(\alpha, \beta, \boldsymbol{\lambda}) = \sum_{i=1,2} \lambda_i \cdot (\alpha - \beta E[W(\lambda)]) \quad (27)$$

s.t.

$$0 \leq \lambda_i \leq \Lambda_i, \quad i = 1, 2, \quad (28)$$

$$\lambda_1 + \lambda_2 < \mu$$

$$h_i(\alpha, \beta, \boldsymbol{\lambda}) \triangleq \underline{v}_i(\lambda_i) - \alpha - \frac{L(\lambda, r_i(c_i - \beta))}{r_i} = 0, \quad i = 1, 2. \quad (29)$$

We first show that the gradients of the constraint functions (29) are linearly independent. We have

$$\nabla h_i(\alpha, \beta, \boldsymbol{\lambda}) = \begin{bmatrix} \frac{\partial h_i(\alpha, \beta, \boldsymbol{\lambda})}{\partial \alpha} \\ \frac{\partial h_i(\alpha, \beta, \boldsymbol{\lambda})}{\partial \beta} \\ \frac{\partial h_i(\alpha, \beta, \boldsymbol{\lambda})}{\partial \lambda_1} \\ \frac{\partial h_i(\alpha, \beta, \boldsymbol{\lambda})}{\partial \lambda_2} \end{bmatrix} = \begin{bmatrix} -1 \\ L_s(\lambda, r_i(c_i - \beta)) \\ \underline{v}'_i(\lambda_i) 1_{\{i=1\}} - \frac{L_\lambda(\lambda, r_i(c_i - \beta))}{r_i} \\ \underline{v}'_i(\lambda_i) 1_{\{i=2\}} - \frac{L_\lambda(\lambda, r_i(c_i - \beta))}{r_i} \end{bmatrix}.$$

Let  $s_i = r_i(c_i - \beta)$ .  $\nabla h_1(\alpha, \beta, \boldsymbol{\lambda})$  and  $\nabla h_2(\alpha, \beta, \boldsymbol{\lambda})$  are linearly dependent if and only if

$$1 = \frac{L_s(\lambda, s_1)}{L_s(\lambda, s_2)} = \frac{\underline{v}'_1(\lambda_1) - \frac{L_\lambda(\lambda, s_1)}{r_1}}{-\frac{L_\lambda(\lambda, s_2)}{r_2}} = \frac{-\frac{L_\lambda(\lambda, s_1)}{r_1}}{\underline{v}'_2(\lambda_2) - \frac{L_\lambda(\lambda, s_2)}{r_2}}.$$

The first equation holds if and only if  $s_1 = s_2$ , since  $L_s(\lambda, s)$  is strictly increasing in  $s$  by Part 2 of Lemma 1. Suppose that  $s_1 = s_2$ , and let  $k = L_\lambda(\lambda, s_1) = L_\lambda(\lambda, s_2)$ . If  $k = 0$  (which holds iff  $s_1 = s_2 = 0$ ), then the last ratio equals zero, which cannot hold. If  $k \neq 0$  then the second-to-last and the last ratio equal one if and only if, respectively,

$$k \left( \frac{1}{r_1} - \frac{1}{r_2} \right) = \underline{v}'_1(\lambda_1) \quad \text{and} \quad k \left( \frac{1}{r_1} - \frac{1}{r_2} \right) = -\underline{v}'_2(\lambda_2).$$

Since  $\underline{v}'_i(\lambda_i) < 0$ , these equations cannot both hold, and we conclude that  $\nabla h_1(\alpha, \beta, \boldsymbol{\lambda})$  and  $\nabla h_2(\alpha, \beta, \boldsymbol{\lambda})$  are linearly independent.

Since  $h_1(\alpha, \beta, \boldsymbol{\lambda}) = h_2(\alpha, \beta, \boldsymbol{\lambda}) = 0$  for any solution that serves both types, and since  $\nabla h_1(\alpha, \beta, \boldsymbol{\lambda})$  and  $\nabla h_2(\alpha, \beta, \boldsymbol{\lambda})$  are linearly independent, the solution  $(\alpha^*, \beta^*, \boldsymbol{\lambda}^*)$  must satisfy the Karush-Kuhn-Tucker (KKT) conditions. Suppose that  $(\alpha^*, \beta^*, \boldsymbol{\lambda}^*)$  is a solution that serves some, but not all, customers of each type, so  $\lambda_i^* \in (0, \Lambda_i)$ . It cannot be optimal to operate at capacity, so  $\lambda_1^* + \lambda_2^* < \mu$ . Let  $\gamma_i$  be the Lagrange multiplier of the constraint  $h_i(\alpha, \beta, \boldsymbol{\lambda}) = 0$ . Suppressing the superscript  $*$  and the arguments of  $\Pi$  and  $h_i$ , the KKT conditions are:

$$\lambda = \frac{\partial \Pi}{\partial \alpha} = \sum_{k=1,2} \gamma_k \frac{\partial h_k}{\partial \alpha} = -(\gamma_1 + \gamma_2), \quad (30)$$

$$-\lambda E[W(\lambda)] = \frac{\partial \Pi}{\partial \beta} = \sum_{k=1,2} \gamma_k \frac{\partial h_k}{\partial \beta} = \gamma_1 L_s(\lambda, s_1) + \gamma_2 L_s(\lambda, s_2), \quad (31)$$

$$\frac{\partial \Pi}{\partial \lambda_i} = \sum_{k=1,2} \gamma_k \frac{\partial h_k}{\partial \lambda_i} = \sum_{k=1,2} \gamma_k \left( \underline{v}'_i(\lambda_i) 1_{\{i=k\}} - \frac{L_\lambda(\lambda, s_k)}{r_k} \right), \quad i = 1, 2, \quad (32)$$

$$h_i = \underline{v}_i(\lambda_i) - \alpha - \frac{L(\lambda, r_i(c_i - \beta))}{r_i} = 0, \quad i = 1, 2, \quad (33)$$

where

$$\frac{\partial \Pi}{\partial \lambda_1} = \frac{\partial \Pi}{\partial \lambda_2} = \alpha - \beta E W(\lambda) - \beta \lambda \frac{dE[W(\lambda)]}{d\lambda}.$$

It follows from (32) that

$$\sum_{k=1,2} \gamma_k \frac{\partial h_k}{\partial \lambda_1} = \sum_{k=1,2} \gamma_k \frac{\partial h_k}{\partial \lambda_2}, \text{ which implies } \gamma_1 \underline{v}'_1(\lambda_1) = \gamma_2 \underline{v}'_2(\lambda_2).$$

Together with (30), this implies that  $\gamma_i < 0$  for  $i = 1, 2$ . Specifically,

$$\gamma_2 = -\frac{\lambda}{\underline{v}'_2(\lambda_2)/\underline{v}'_1(\lambda_1) + 1} < 0 \text{ and } \gamma_1 = -\frac{\lambda}{1 + \underline{v}'_1(\lambda_1)/\underline{v}'_2(\lambda_2)} < 0.$$

Next, multiply (30) by  $E[W(\lambda)]$  and add it to (31) to obtain

$$\gamma_1 (L_s(\lambda, s_1) - E[W(\lambda)]) + \gamma_2 (L_s(\lambda, s_2) - E[W(\lambda)]) = 0. \quad (34)$$

Noting that  $\gamma_i < 0$  for  $i = 1, 2$ , this holds if and only if one of the following conditions is satisfied:

$$L_s(\lambda, r_1(c_1 - \beta)) > E[W(\lambda)] > L_s(\lambda, r_2(c_2 - \beta))$$

or

$$L_s(\lambda, r_1(c_1 - \beta)) < E[W(\lambda)] < L_s(\lambda, r_2(c_2 - \beta))$$

or

$$L_s(\lambda, r_1(c_1 - \beta)) = E[W(\lambda)] = L_s(\lambda, r_2(c_2 - \beta)).$$

*Part 1.* We show that for  $r_1, r_2 > 0$ , (34) holds if and only if  $c_2 < \beta < c_1$ . If  $\beta \geq c_1 > c_2$ , we have by Part 2 of Lemma 1:

$$L_s(\lambda, r_1(c_1 - \beta)) \leq E[W(\lambda)] \text{ and } L_s(\lambda, r_2(c_2 - \beta)) < E[W(\lambda)].$$

Since  $\gamma_i < 0$ , it follows that the LHS of (34) is strictly positive; so that  $\beta < c_1$ . A similar argument shows that  $\beta > c_2$ . With  $c_2 < \beta < c_1$ , we have  $L_s(\lambda, r_1(c_1 - \beta)) > 0 > L_s(\lambda, r_2(c_2 - \beta))$ , so that  $\underline{v}_2 < \alpha < \underline{v}_1$  follows from (29).

*Part 2.* If  $r_j = 0 < r_i$ , then  $L_s(\lambda, r_j(c_j - \beta)) = E[W(\lambda)]$ , and (34) reduces to

$$\gamma_j (L_s(\lambda, r_i(c_i - \beta)) - E[W(\lambda)]) = 0.$$

Since  $\gamma_j < 0$ , it holds if and only if  $\beta = c_i$ . The type- $i$  demand constraint in (29) implies  $\alpha = \underline{v}_i$ . ■

**Proof of Proposition 4.** The analysis in Section 3.3 implies that the first-best tariff set is IC if and only if  $\lambda^*$  satisfies (12) for  $\beta_1 = c_1$  and  $\beta_2 = c_2$ . Noting that  $L(\lambda, r_i(c_i - \beta_i))/r_i = 0$  if  $\beta_i = c_i$ , these conditions are equivalent to

$$-\frac{L(\lambda^*, r_2(c_2 - c_1))}{r_2} \leq \underline{v}_1(\lambda_1^*) - \underline{v}_2(\lambda_2^*) \leq \frac{L(\lambda^*, r_1(c_1 - c_2))}{r_1}, \quad (35)$$

where type-2 (type-1) chooses her targeted tariff if and only if the first (second) inequality holds. Furthermore, since  $L(\lambda, s) < 0$  for  $s < 0$  by Part 2 of Lemma 1, and since  $L(\lambda, r(c_1 - c_2))/r$

is strictly increasing in  $r \geq 0$  with  $\lim_{r \rightarrow 0} L(\lambda, r(c_1 - c_2))/r = (c_1 - c_2)E[W(\lambda)]$  by Part 3 of Lemma 1, it follows that for any  $r_1$  and  $r_2$ ,

$$0 < -\frac{L(\lambda^*, r_2(c_2 - c_1))}{r_2} \leq (c_1 - c_2)E[W(\lambda^*)] \leq \frac{L(\lambda^*, r_1(c_1 - c_2))}{r_1}, \quad (36)$$

where the second inequality is strict if and only if  $r_2 > 0$ , and the last if and only if  $r_1 > 0$ .

We establish the claims by relating them to (35) via (36).

*Part 1.* Because  $\alpha_i^* = \underline{v}_i(\lambda_i^*)$ , if  $\alpha_1^* \leq \alpha_2^*$ , then  $\underline{v}_1(\lambda_1^*) - \underline{v}_2(\lambda_2^*) \leq 0$ . Then the first inequality in (36) implies that the first inequality in (35) cannot hold, so that IC is violated for any  $r_i$ .

*Part 2.* If  $p_1^* = \alpha_1^* - c_1E[W(\lambda^*)] = p_2^* = \alpha_2^* - c_2E[W(\lambda^*)]$ , then because  $c_1 > c_2$ , we have  $\alpha_1^* > \alpha_2^*$  and  $\underline{v}_1(\lambda_1^*) - \underline{v}_2(\lambda_2^*) = (c_1 - c_2)E[W(\lambda^*)]$ . From (36) we have that (35) holds for all  $r_i$ .

*Part 3.* If  $\alpha_1^* > \alpha_2^*$ , then  $\underline{v}_1(\lambda_1^*) - \underline{v}_2(\lambda_2^*) > 0$ , and we have two cases with  $p_1^* \neq p_2^*$ .

(i) Suppose that  $p_1^* > p_2^*$ . Then  $\underline{v}_1(\lambda_1^*) - \underline{v}_2(\lambda_2^*) > (c_1 - c_2)E[W(\lambda^*)]$ . From (36) we have

$$0 < -\frac{L(\lambda^*, r_2(c_2 - c_1))}{r_2} \leq (c_1 - c_2)E[W(\lambda^*)] < \underline{v}_1(\lambda_1^*) - \underline{v}_2(\lambda_2^*), \quad (37)$$

so the first inequality in (35) holds and type-2 chooses her targeted tariff for all  $r_2$ . If type-1 is RN, she also prefers the type-2 tariff: we have  $\lim_{r_1 \rightarrow 0} L(\lambda^*, r_1(c_1 - c_2))/r_1 = (c_1 - c_2)E[W(\lambda^*)] < \underline{v}_1(\lambda_1^*) - \underline{v}_2(\lambda_2^*)$ , where the equality follows from (36) and the inequality from (37), so the second inequality in (35) is violated. Because  $L(\lambda^*, r_1(c_1 - c_2))/r_1$  strictly increases in  $r_1$  by Part 3 of Lemma 1, and  $\lim_{r_1 \rightarrow \infty} L(\lambda^*, r_1(c_1 - c_2))/r_1 = \infty$  since  $c_1 > c_2$ , there is an unique  $\underline{r} \in (0, \infty)$  such that

$$\underline{v}_1(\lambda_1^*) - \underline{v}_2(\lambda_2^*) = \frac{L(\lambda^*, r_1(c_1 - c_2))}{r_1} \Big|_{r_1=\underline{r}}$$

and the second inequality in (35) holds if and only if  $r_1 \geq \underline{r}$ .

(ii) Suppose that  $p_1^* < p_2^*$ . Then  $\underline{v}_1(\lambda_1^*) - \underline{v}_2(\lambda_2^*) < (c_1 - c_2)E[W(\lambda^*)]$ . From (36) we have

$$0 < \underline{v}_1(\lambda_1^*) - \underline{v}_2(\lambda_2^*) < (c_1 - c_2)E[W(\lambda^*)] \leq \frac{L(\lambda^*, r_1(c_1 - c_2))}{r_1}, \quad (38)$$

where  $\alpha_1^* > \alpha_2^*$  implies the first inequality. It follows that the second inequality in (35) holds and type-1 chooses her targeted tariff for all  $r_1$ . If type-2 is RN, she also prefers the type-1 tariff: we have  $\lim_{r_2 \rightarrow 0} -L(\lambda^*, r_2(c_2 - c_1))/r_2 = (c_1 - c_2)E[W(\lambda^*)] > \underline{v}_1(\lambda_1^*) - \underline{v}_2(\lambda_2^*)$ , where the equality follows from (36) and the inequality from (38), so that the first inequality in (35) is violated. Since  $-L(\lambda^*, r_2(c_2 - c_1))/r_2$  strictly decreases in  $r_2$  by Part 3 of Lemma 1, and  $\lim_{r_2 \rightarrow \infty} L(\lambda^*, r_2(c_2 - c_1))/r_2 = 0$  because  $c_2 < c_1$ , there is an unique  $\underline{r} \in (0, \infty)$  such that

$$\underline{v}_1(\lambda_1^*) - \underline{v}_2(\lambda_2^*) = -\frac{L(\lambda^*, r_2(c_2 - c_1))}{r_2} \Big|_{r_2=\underline{r}}$$

and the first inequality in (35) holds if and only if  $r_2 \geq \underline{r}$ . ■

### Sufficient conditions for Assumptions A2 and A3.

A2. Two mild conditions are sufficient for  $\Pi(\lambda)$  and  $\Pi^f(\lambda; r)$  to be strictly concave in  $\lambda$ .

(i) The gross revenue function  $\lambda \underline{v}(\lambda)$  is strictly concave. Many common distributions satisfy this assumption, e.g., the uniform, normal, logistic, Laplace and power function distributions, and the gamma and Weibull distributions with shape parameter  $\geq 1$ .

(ii) The function  $\lambda L(\lambda, s)$  is convex in  $\lambda$  for  $s \geq 0$ , i.e.,  $2L_\lambda(\lambda, s) + \lambda L_{\lambda\lambda}(\lambda, s) \geq 0$ . This assumption also implies that  $\lambda E[W(\lambda)]$  is convex in  $\lambda$  since  $L(\lambda, r)/r$  converges uniformly to  $E[W(\lambda)]$  as  $r \rightarrow 0$ . This assumption seems reasonable for many queueing models. A sufficient condition is that  $W(\lambda)$  is stochastically increasing in  $\lambda$  and that its c.d.f. is concave in  $\lambda$ ; for  $G/G/1$  queues both properties follow from a similar argument as in Weber (1983).

A3.  $L_\lambda(\lambda, s)/s$  increases in  $s$ , i.e.,  $sL_{\lambda s}(\lambda, s) - L_\lambda(\lambda, s) \geq 0$ . By Lemma 1, this holds for the  $M/G/1$  queue:  $L_\lambda(\lambda, 0) = 0$  by Part 2 of Lemma 1 and  $L_\lambda(\lambda, s)$  is strictly convex in  $s$  by Part 4(b).

**Proof of Proposition 5.** *Part 1.* That  $\Pi^f(r) < \Pi^*$  for  $r > 0$  follows from the uniqueness of the optimal price function by Part 1 of Proposition 1. We next show that  $\lambda^f(r) < \lambda^*$  for  $r > 0$ . We first establish that  $\Pi'(\lambda) > \Pi_\lambda^f(\lambda; r)$ . From (14) and (15)

$$\Pi'(\lambda) = \underline{v}(\lambda) + \lambda \underline{v}'(\lambda) - c \left( E[W(\lambda)] + \lambda \frac{dE[W(\lambda)]}{d\lambda} \right), \quad (39)$$

$$\Pi_\lambda^f(\lambda; r) = \underline{v}(\lambda) + \lambda \underline{v}'(\lambda) - \frac{L(\lambda, rc) + \lambda L_\lambda(\lambda, rc)}{r}. \quad (40)$$

The difference satisfies

$$\Pi'(\lambda) - \Pi_\lambda^f(\lambda; r) = \left( \frac{L(\lambda, rc)}{r} - cE[W(\lambda)] \right) + \lambda \left( \frac{L_\lambda(\lambda, rc)}{r} - c \frac{dE[W(\lambda)]}{d\lambda} \right) > 0, \quad (41)$$

because the first bracket is positive by Part 3 of Lemma 1, and the second is non-negative as we show next. A3 implies that  $L_\lambda(\lambda, rc)/r$  increases in  $r$ . Furthermore,

$$\lim_{r \rightarrow 0} \frac{L_\lambda(\lambda, rc)}{r} = \frac{d}{d\lambda} \lim_{r \rightarrow 0} \frac{L(\lambda, rc)}{r} = c \frac{dE[W(\lambda)]}{d\lambda}, \quad (42)$$

where the first equality holds since  $L_\lambda(\lambda, 0) = 0$  (Part 2 of Lemma 1) and from l'Hôpital's rule, and the second by Part 3 of Lemma 1. Using (41) we have  $\Pi_\lambda^f(\lambda^*; r) < \Pi'(\lambda^*) = 0$  where the equality follows by A1. Finally, because  $\Pi(\lambda)$  is strictly concave by A2, the optimal  $\Pi^f(\lambda; r)$  is obtained for  $\lambda < \lambda^*$ .

Since Part 3 of Lemma 1 and (42) imply that  $\lim_{r \rightarrow 0} \Pi_\lambda^f(\lambda; r) = \Pi'(\lambda)$  for all  $\lambda$ ,  $\lim_{r \rightarrow 0} \lambda^f(r) = \lambda^*$  and  $\lim_{r \rightarrow 0} \Pi^f(r) = \Pi^*$ . That  $\lim_{r \rightarrow 0} \alpha^f(r) < \alpha^*$  follows from (16) because

$$\lim_{r \rightarrow 0} \alpha^f(r) = \lim_{r \rightarrow 0} \left( \underline{v}(\lambda^f(r)) - \frac{L(\lambda^f(r), rc)}{r} \right) = \underline{v}(\lambda^*) - cE[W(\lambda^*)] < \alpha^* = \underline{v}(\lambda^*).$$

*Part 2.* First note that since  $\lambda^f(r) < \lambda^*$ , if  $\lambda^f(r) > 0$  it must satisfy  $\Pi_\lambda^f(\lambda^f(r); r) = 0$ .

Next, since  $\Pi^f(\lambda; r)$  is strictly concave in  $\lambda$  for fixed  $r$  (by A2) and since  $\Pi_{\lambda r}^f(\lambda; r) < 0$  as shown in (43), it follows that if  $\lambda^f(r) > 0$  then  $\lambda^f(r)$  and  $\Pi^f(r)$  are strictly decreasing at  $r$ , and that if  $\lambda^f(r^\circ) = 0$  for some  $r^\circ$  then  $\lambda^f(r) = \Pi^f(r) = 0$  for all  $r \geq r^\circ$ . From (40) we have

$$\begin{aligned} \Pi_{\lambda r}^f(\lambda; r) &= - \frac{cr(L_s(\lambda, rc) + \lambda L_{\lambda s}(\lambda, rc)) - (L(\lambda, rc) + \lambda L_\lambda(\lambda, rc))}{r^2} \\ &= - \frac{(crL_s(\lambda, rc) - L(\lambda, rc)) + \lambda(crL_{\lambda s}(\lambda, rc) - L_\lambda(\lambda, rc))}{r^2} < 0, \end{aligned} \quad (43)$$

where the first bracket in the numerator is positive since  $L(\lambda, rc)/r$  is strictly increasing in  $r \geq 0$  by Part 3 of Lemma 1, and the second is non-negative by A3.

It remains to establish the threshold  $\bar{r}$  in (17). Since  $\Pi^f(\lambda; r)$  is strictly concave in  $\lambda$  for fixed  $r$ , the arrival rate  $\lambda^f(r) > 0$  if and only if  $\Pi_\lambda^f(0; r) > 0$ . Note that  $\lim_{r \rightarrow 0} \Pi_\lambda^f(0; r) = \Pi'(0) > 0$  (the equality follows from Part 1, the inequality from  $AI$ ), and that from (40)

$$\lim_{r \rightarrow \infty} \Pi_\lambda^f(0; r) = \underline{v}(0) - \lim_{r \rightarrow \infty} \frac{L(0, rc)}{r} = \underline{v}(0) - c \lim_{r \rightarrow \infty} L_s(0, rc) = -\infty.$$

Since  $\Pi_{\lambda^r}^f(0; r) < 0$ , there is an unique risk aversion parameter  $\bar{r} \in (0, \infty)$  such that  $\Pi_\lambda^f(0, \bar{r}) = 0$ , or equivalently,  $L(0, \bar{r}c)/\bar{r} = \underline{v}(0)$ , and  $\Pi_\lambda^f(0; r) > 0$  if and only if  $r < \bar{r}$ .

*Part 3.* See Figure 2 for Example 1 which shows that  $\alpha^f(r) > 0$  and increases in  $r \in [0, 2]$ . That  $\alpha^f(r)$  is nonmonotone in  $r$  follows from (16) because

$$\lim_{r \rightarrow \bar{r}} \alpha^f(r) = \lim_{r \rightarrow \bar{r}} \left( \underline{v}(\lambda^f(r)) - \frac{L(\lambda^f(r), rc)}{r} \right) = \underline{v}(0) - \frac{L(0, \bar{r}c)}{\bar{r}} = 0.$$

The second equality holds since  $\liminf_{r \rightarrow \bar{r}} \lambda^f(r) = 0$  by Part 2, and the third by (17). ■

**Proof of Proposition 6.** Let  $\Pi^f(\lambda, \mu; r)$  be the revenue function under flat rate pricing. With RN customers, flat rate and optimal lead time-dependent pricing yield the same revenue, so  $\Pi^f(\lambda, \mu; 0)$  is the revenue function under optimal lead time-dependent pricing. In the proof we first derive properties of  $\Pi^f(\lambda, \mu; r)$  for  $r > 0$  and then take limits as  $r \rightarrow 0$ .

Let the r.v.  $W(\lambda, \mu)$  denote the steady-state lead time,  $\widetilde{W}(\lambda, \mu, s) := E[\exp(sW(\lambda, \mu))]$  its MGF, and  $L(\lambda, \mu, s) := \ln \widetilde{W}(\lambda, \mu, s)$  its semi-invariant MGF. We have from (14) and (15) that

$$\Pi^f(\lambda, \mu; 0) = \lambda(\underline{v}(\lambda) - cE[W(\lambda, \mu)]), \quad (44)$$

$$\Pi^f(\lambda, \mu; r) = \lambda \left( \underline{v}(\lambda) - \frac{1}{r} L(\lambda, \mu, rc) \right), \quad (45)$$

$$\Pi_\lambda^f(\lambda, \mu; r) = \underline{v}(\lambda) + \lambda \underline{v}'(\lambda) - \frac{L(\lambda, \mu, rc) + \lambda L_\lambda(\lambda, \mu, rc)}{r}, \quad (46)$$

$$\Pi_\mu^f(\lambda, \mu; r) = -\lambda \frac{L_\mu(\lambda, \mu, rc)}{r}. \quad (47)$$

Let  $\lambda^{f*}(\mu; r) := \arg \max_\lambda \Pi^f(\lambda, \mu; r)$ , so  $\Pi^{f*}(\mu) = \Pi^f(\lambda^{f*}(\mu; r), \mu; r)$  and  $\Pi^*(\mu) = \Pi^f(\lambda^{f*}(\mu; 0), \mu; 0)$ . *Parts 1(a)/2(a).* We have  $\lim_{\mu \rightarrow \infty} \Pi^{f*}(\mu) = \lim_{\mu \rightarrow \infty} \Pi^*(\mu) = \max_{\lambda \in [0, \Lambda]} \lambda \underline{v}(\lambda)$  since  $\lim_{\mu \rightarrow \infty} L(\lambda, \mu, rc) = 0$  and so  $\lim_{\mu \rightarrow \infty} \Pi^f(\lambda, \mu; r) = \lambda \underline{v}(\lambda)$  for all  $\lambda, r$ . We have that

$$L_\lambda(\lambda, \mu, rc) \geq 0 \geq L_\mu(\lambda, \mu, rc) \text{ for } \lambda < \mu, rc \geq 0, \quad (48)$$

because  $W(\lambda, \mu)$  is stochastically increasing in  $\lambda$  (decreasing in  $\mu$ ), and therefore the expectation of every increasing function of  $W(\lambda, \mu)$ , such as the MGF with a positive argument ( $rc \geq 0$ ), is increasing in  $\lambda$  (decreasing in  $\mu$ ).

It follows that the bracketed term in (45) decreases in  $\lambda$  and increases in  $\mu$ , so  $\Pi^{f*}(\mu) = 0$  for

$$\mu \leq \underline{\mu}^f := \arg \left\{ \mu \geq 0 : \underline{v}(0) - \frac{1}{r} L(0, \mu, rc) = 0 \right\}. \quad (49)$$

(Note that  $L(0, \mu, rc)$  is the semi-invariant MGF of the service time, evaluated at  $rc$ .) Similarly, we have from (44) that  $\Pi^*(\mu) = 0$  for

$$\mu \leq \underline{\mu} := \arg \{ \mu \geq 0 : \underline{v}(0) - cE[W(0, \mu)] = 0 \} = c/\underline{v}(0), \quad (50)$$

where the last equality holds because  $E[W(0, \mu)] = 1/\mu$ . Note that  $\underline{\mu} < \underline{\mu}^f$  because  $cE[W(0, \mu)] < \frac{1}{r}L(0, \mu, rc)$  for  $r > 0$  by Part 3 of Lemma 1.

For  $\mu > \underline{\mu}^f$  we have  $\lambda^{f*}(\mu; r) > 0$ , and furthermore

$$\frac{d\Pi^f(\lambda^{f*}(\mu; r), \mu; r)}{d\mu} = \Pi_\mu(\lambda^{f*}(\mu; r), \mu; r) = -\lambda^{f*}(\mu; r) \frac{L_\mu(\lambda^{f*}(\mu; r), \mu, rc)}{r} \geq 0. \quad (51)$$

The first equality in (51) holds since  $\Pi_\lambda^f(\lambda^*(\mu; r), \mu; r) = 0$  by A1, and  $|d\lambda^{f*}(\mu; r)/d\mu| < \infty$  since  $\Pi_{\lambda\lambda}^f(\lambda, \mu; r) < 0$  by A2, the second equality holds by (47), and the inequality follows from (48).

Furthermore, we have

$$\lim_{\mu \rightarrow \underline{\mu}^f} \Pi^{f*'}(\mu) = 0 = \lim_{\mu \rightarrow \infty} \Pi^{f*'}(\mu). \quad (52)$$

The first equality holds by (51) since  $\lambda^{f*}(\underline{\mu}^f; r) = 0$ , and  $L(0, \underline{\mu}^f, rc) = \underline{v}(0) < \infty$  implies that  $|L_\mu(0, \underline{\mu}^f, rc)| < \infty$ . The second equality holds since  $\Pi^{f*}(\mu)$  is increasing with  $\lim_{\mu \rightarrow \infty} \Pi^{f*}(\mu) = \max_{\lambda \in [0, \Delta]} \lambda \underline{v}(\lambda)$ .

A similar argument (as  $r \rightarrow 0$ ) shows  $\Pi^{*'}(\mu) \geq 0$  for  $\mu > \underline{\mu}$  and  $\lim_{\mu \rightarrow \underline{\mu}} \Pi^{*'}(\mu) = 0 = \lim_{\mu \rightarrow \infty} \Pi^{*'}(\mu)$ .

*Parts 1(b)/2(b)* We omit the straightforward proof that  $0 < \bar{b}^f < \bar{b} < \infty$ . That  $\mu^*(b) > \underline{\mu}$  for  $b < \bar{b}$  ( $\mu^{f*}(b) > \underline{\mu}^f$  for  $b < \bar{b}^f$ ) is immediate from 1(a) (from 2(a)). That  $\mu^*(b)$  and  $\mu^{f*}(b)$  decrease in  $b$  follows since the profit functions  $(\Pi^*(\mu) - b\mu)$  and  $(\Pi^{f*}(\mu) - b\mu)$  are submodular in  $(b, \mu)$ . ■

## References

Gallager, R. G. 1996. *Discrete Stochastic Processes*. Kluwer, Boston, MA.

Weber, R.R. 1983. A note on waiting times in single-server queues. *Oper. Res.* **31** 950-951.
